# Supplementary material for: Cross-classification of bone mass status and possible sarcopenia delineates a gradient in fall risk: parallel concordance of BMD severity, fragility-fracture burden, and bone turnover biomarker profiles
Source: Research Square preprint supplement (doi:10.21203/rs.3.rs-8733004/v1), 2026-02-04
Supplement: Supplementary file 1 [file 9e5b5b448c6b2c6de09b7af5.docx]

### **Supplement** Table S1. Additional covariates across six bone mass–sarcopenia strata.

| **Characteristic** | **Category** | **Total**  **(N=1786)** | **Normal/No**  **(n=312)** | **Normal/Yes**  **(n=103)** | **Osteopenia/No**  **(n=575)** | **Osteopenia/Yes**  **(n=167)** | **Osteoporosis/No**  **(n=415)** | **Osteoporosis/Yes**  **(n=214)** | **ASMD** | **P value** |
| --- | --- | --- | --- | --- | --- | --- | --- | --- | --- | --- |
| Lifestyle and environment (covariates in Model 3) |  |  |  |  |  |  |  |  |  |  |
| Diet type, n (%) |  |  |  |  |  |  |  |  | 0.319 | 0.377 |
|  | Meat-based/animal-based | 1337 (74.9%) | 233 (74.4%) | 84 (81.6%) | 435 (75.8%) | 128 (76.6%) | 307 (74.0%) | 150 (70.1%) | — | — |
|  | Mixed diet | 387 (21.7%) | 65 (20.8%) | 15 (14.6%) | 118 (20.6%) | 33 (19.8%) | 97 (23.4%) | 59 (27.6%) | — | — |
|  | Vegetarian/mostly plant-based | 43 (2.4%) | 11 (3.5%) | 3 (2.9%) | 17 (3.0%) | 3 (1.8%) | 7 (1.7%) | 2 (0.9%) | — | — |
|  | Missing | 19 (1.1%) | 4 (1.3%) | 1 (1.0%) | 4 (0.7%) | 3 (1.8%) | 4 (1.0%) | 3 (1.4%) | — | — |
| Sleep duration, n (%) |  |  |  |  |  |  |  |  | 0.302 | 0.020 |
|  | 4–6 h | 705 (39.5%) | 126 (40.3%) | 52 (50.5%) | 204 (35.5%) | 74 (44.3%) | 165 (39.8%) | 84 (39.3%) | — | — |
|  | 6–8 h | 899 (50.3%) | 166 (53.0%) | 41 (39.8%) | 309 (53.8%) | 78 (46.7%) | 203 (48.9%) | 102 (47.7%) | — | — |
|  | 8–10 h | 142 (8.0%) | 18 (5.8%) | 7 (6.8%) | 51 (8.9%) | 9 (5.4%) | 37 (8.9%) | 20 (9.3%) | — | — |
|  | ≥10 h | 30 (1.7%) | 2 (0.6%) | 1 (1.0%) | 8 (1.4%) | 3 (1.8%) | 9 (2.2%) | 7 (3.3%) | — | — |
|  | <4 h | 6 (0.3%) | 0 (0.0%) | 1 (1.0%) | 1 (0.2%) | 3 (1.8%) | 0 (0.0%) | 1 (0.5%) | — | — |
|  | Missing | 4 (0.2%) | 1 (0.3%) | 1 (1.0%) | 1 (0.2%) | 0 (0.0%) | 1 (0.2%) | 0 (0.0%) | — | — |
| Nocturia frequency, n (%) |  |  |  |  |  |  |  |  | 0.274 | 0.181 |
|  | 0 times/night | 588 (32.9%) | 115 (36.7%) | 41 (39.8%) | 188 (32.8%) | 46 (27.5%) | 135 (32.5%) | 63 (29.4%) | — | — |
|  | 1 time/night | 967 (54.1%) | 163 (52.1%) | 53 (51.5%) | 321 (55.9%) | 89 (53.3%) | 226 (54.5%) | 115 (53.7%) | — | — |
|  | 2 times/night | 208 (11.6%) | 31 (9.9%) | 7 (6.8%) | 57 (9.9%) | 31 (18.6%) | 48 (11.6%) | 34 (15.9%) | — | — |
|  | ≥3 times/night | 20 (1.1%) | 2 (0.6%) | 2 (1.9%) | 7 (1.2%) | 1 (0.6%) | 6 (1.4%) | 2 (0.9%) | — | — |
|  | Missing | 3 (0.2%) | 2 (0.6%) | 0 (0.0%) | 1 (0.2%) | 0 (0.0%) | 0 (0.0%) | 0 (0.0%) | — | — |
| Floor level of residence, floors |  | 4 [2, 6] | 4 [2, 5] | 4 [2, 6] | 4 [2, 6] | 4 [2, 6] | 4 [2, 6] | 3 [2, 6] | 0.206 | 0.375 |
|  | Missing | 28 (1.6%) | 5 (1.6%) | 4 (3.9%) | 4 (0.7%) | 4 (2.4%) | 5 (1.2%) | 6 (2.8%) | — | — |
| Elevator available at residence, n (%) |  |  |  |  |  |  |  |  | 0.242 | 0.104 |
|  | No | 1177 (65.9%) | 211 (67.4%) | 65 (63.1%) | 394 (68.6%) | 104 (62.3%) | 270 (65.1%) | 133 (62.1%) | — | — |
|  | Yes | 535 (30.0%) | 90 (28.8%) | 30 (29.1%) | 166 (28.9%) | 53 (31.7%) | 130 (31.3%) | 66 (30.8%) | — | — |
|  | Missing | 74 (4.1%) | 12 (3.8%) | 8 (7.8%) | 14 (2.4%) | 10 (6.0%) | 15 (3.6%) | 15 (7.0%) | — | — |
| Stair-climbing trips per day, round-trips |  | 2 [0, 3] | 2 [0, 3] | 2 [0, 3] | 2 [0, 3] | 1 [0, 2] | 2 [0, 3] | 2 [0, 3] | 0.314 | < 0.001 |
| Vigorous-intensity activity, min/week |  | 0 [0, 0] | 0 [0, 0] | 0 [0, 0] | 0 [0, 0] | 0 [0, 0] | 0 [0, 0] | 0 [0, 0] | 0.251 | 0.100 |
| Moderate-intensity activity, min/week |  | 0 [0, 420] | 0 [0, 420] | 0 [0, 495] | 0 [0, 295] | 0 [0, 420] | 0 [0, 360] | 0 [0, 360] | 0.384 | < 0.001 |
| Sitting time on a weekday, min/day |  | 120 [0, 210] | 120 [0, 240] | 120 [60, 210] | 120 [0, 210] | 120 [0, 240] | 120 [0, 190] | 120 [0, 180] | 0.200 | 0.155 |
| Diarrhea, n (%) |  |  |  |  |  |  |  |  | 0.128 | 0.761 |
|  | No | 1657 (92.8%) | 289 (92.3%) | 97 (94.2%) | 535 (93.2%) | 151 (90.4%) | 386 (93.0%) | 199 (93.0%) | — | — |
|  | Yes | 128 (7.2%) | 23 (7.3%) | 6 (5.8%) | 39 (6.8%) | 16 (9.6%) | 29 (7.0%) | 15 (7.0%) | — | — |
|  | Missing | 1 (0.1%) | 1 (0.3%) | 0 (0.0%) | 0 (0.0%) | 0 (0.0%) | 0 (0.0%) | 0 (0.0%) | — | — |
| Female-specific covariate |  |  |  |  |  |  |  |  | — | — |
| Menopausal status (women only), n (%) |  |  |  |  |  |  |  |  | 0.784 | < 0.001 |
|  | Postmenopausal | 1181 (89.5%) | 136 (68.3%) | 47 (79.7%) | 373 (89.7%) | 105 (92.9%) | 345 (97.5%) | 175 (97.8%) | — | — |
|  | Premenopausal | 130 (9.8%) | 60 (30.2%) | 10 (16.9%) | 42 (10.1%) | 8 (7.1%) | 7 (2.0%) | 3 (1.7%) | — | — |
|  | Missing | 9 (0.7%) | 3 (1.5%) | 2 (3.4%) | 1 (0.2%) | 0 (0.0%) | 2 (0.6%) | 1 (0.6%) | — | — |

**Note:** Strata were defined by cross-classification of bone mass status (normal, osteopenia, osteoporosis) and possible sarcopenia status (No/Yes). Bone mass status was categorized using lumbar spine and total hip **dual-energy X-ray absorptiometry (DXA)** T-scores; possible sarcopenia was defined using prespecified cut-offs (see Methods). Data are n (%) or median [**interquartile range (IQR)**]. Missing values are shown as a separate category where applicable. *P* values compare distributions across the six strata using *χ*² tests (categorical variables) and Kruskal–Wallis tests (continuous variables). **ASMD** denotes the maximum pairwise absolute standardized mean difference across the six strata (for multinomial variables, ASMD was computed as the maximum across indicator levels). Menopausal status was summarized among women only; percentages were calculated using the number of women in each stratum as the denominator. Two-sided *P* values are reported to three decimals (< 0.001 shown as < 0.001).

**Abbreviations:** ASMD, absolute standardized mean difference; DXA, dual-energy X-ray absorptiometry; IQR, interquartile range.

### **Supplement** Table S2. Fully adjusted logistic regression for falls outcomes.

| **Variable** | **Contrast/Level** | **Any fall (≥1): OR**  **(95% CI)** | **P value** | **Recurrent falls (≥2): OR**  **(95% CI)** | **P value** |
| --- | --- | --- | --- | --- | --- |
| Exposure group (bone mass × possible sarcopenia) | Normal/Yes vs Normal/No | 1.47 (0.79–2.71) | 0.221 | 1.34 (0.47–3.77) | 0.584 |
| Exposure group (bone mass × possible sarcopenia) | Osteopenia/No vs Normal/No | 1.03 (0.68–1.57) | 0.889 | 1.29 (0.65–2.56) | 0.460 |
| Exposure group (bone mass × possible sarcopenia) | Osteopenia/Yes vs Normal/No | 1.51 (0.90–2.54) | 0.119 | 1.91 (0.86–4.25) | 0.114 |
| Exposure group (bone mass × possible sarcopenia) | Osteoporosis/No vs Normal/No | 1.38 (0.88–2.15) | 0.157 | 1.00 (0.47–2.14) | 0.994 |
| Exposure group (bone mass × possible sarcopenia) | Osteoporosis/Yes vs Normal/No | 1.68 (1.01–2.78) | 0.045 | 1.29 (0.56–2.97) | 0.543 |
| Sex | Female vs Male | 1.55 (1.04–2.30) | 0.030 | 1.80 (0.94–3.42) | 0.075 |
| Age, years | Per 1-year increase | 1.02 (1.00–1.03) | 0.065 | 1.02 (0.99–1.05) | 0.276 |
| Body mass index, kg/m² | Per 1-unit increase | 1.00 (0.98–1.02) | 0.776 | 0.98 (0.93–1.03) | 0.398 |
| Education | Primary school vs Illiterate | 1.01 (0.48–2.10) | 0.984 | 0.72 (0.25–2.06) | 0.539 |
| Education | Junior high school vs Illiterate | 0.92 (0.45–1.86) | 0.808 | 0.75 (0.28–2.00) | 0.560 |
| Education | High school/technical/vocational vs Illiterate | 0.82 (0.40–1.68) | 0.592 | 0.62 (0.23–1.71) | 0.354 |
| Education | Junior college vs Illiterate | 0.46 (0.20–1.06) | 0.068 | 0.34 (0.10–1.20) | 0.094 |
| Education | Bachelor’s degree or above vs Illiterate | 1.10 (0.45–2.66) | 0.832 | 0.86 (0.24–3.06) | 0.810 |
| Monthly household income | 1,000–3,000 vs ≤1,000 | 1.35 (0.86–2.14) | 0.195 | 1.34 (0.64–2.80) | 0.437 |
| Monthly household income | 3,000–5,000 vs ≤1,000 | 1.50 (0.93–2.43) | 0.094 | 1.94 (0.91–4.12) | 0.086 |
| Monthly household income | 5,000–8,000 vs ≤1,000 | 1.08 (0.64–1.84) | 0.773 | 0.74 (0.29–1.87) | 0.526 |
| Monthly household income | ≥8,000 vs ≤1,000 | 0.93 (0.46–1.85) | 0.826 | 1.45 (0.51–4.14) | 0.484 |
| Smoking status | Current vs Never | 0.86 (0.54–1.39) | 0.547 | 1.06 (0.52–2.18) | 0.868 |
| Smoking status | Passive vs Never | 1.10 (0.45–2.65) | 0.838 | 0.83 (0.18–3.80) | 0.810 |
| Smoking status | Former vs Never | 1.75 (0.77–3.95) | 0.180 | 0.50 (0.06–3.98) | 0.514 |
| Alcohol drinking | Current vs Never | 0.84 (0.51–1.38) | 0.487 | 1.05 (0.48–2.28) | 0.908 |
| Alcohol drinking | Former vs Never | 0.30 (0.07–1.32) | 0.111 | 0.69 (0.09–5.53) | 0.727 |
| Diet type | Meat-based vs Mixed | 0.54 (0.18–1.57) | 0.255 | NE | 0.999 |
| Diet type | Vegetarian/mostly plant-based vs Mixed | 0.95 (0.70–1.29) | 0.754 | 0.98 (0.61–1.57) | 0.932 |
| History of chronic disease(s) | Yes vs No | 0.84 (0.64–1.10) | 0.204 | 0.67 (0.44–1.03) | 0.068 |
| Long-term glucocorticoid use | Yes vs No | 1.99 (0.83–4.74) | 0.120 | 1.77 (0.53–5.98) | 0.355 |
| Rheumatoid arthritis | Yes vs No | 1.32 (0.88–2.00) | 0.180 | 1.57 (0.87–2.84) | 0.135 |
| Diarrhea | Yes vs No | 1.36 (0.86–2.16) | 0.191 | 2.03 (1.10–3.72) | 0.023 |
| Elevator available at residence | Missing vs No | NE | 0.999 | NE | 1.000 |
| Elevator available at residence | Yes vs No | 0.96 (0.66–1.39) | 0.833 | 0.77 (0.42–1.42) | 0.405 |
| Height loss > 3 cm | Yes vs No | 0.98 (0.72–1.34) | 0.913 | 1.11 (0.70–1.78) | 0.654 |
| Fatigue/joint pain affecting daily life | Yes vs No | 1.10 (0.80–1.52) | 0.563 | 1.20 (0.73–1.96) | 0.466 |
| Parental history of fragility fracture | Yes vs No | 1.12 (0.75–1.67) | 0.592 | 1.42 (0.79–2.54) | 0.240 |
| Minor-trauma hip fracture history | Yes vs No | 0.99 (0.47–2.08) | 0.973 | 0.35 (0.08–1.59) | 0.174 |
| Sleep duration (ordinal) | Per 1-category increase | 1.08 (0.90–1.30) | 0.416 | 1.17 (0.88–1.54) | 0.279 |
| Nocturia frequency (ordinal) | Per 1-category increase | 1.22 (1.01–1.48) | 0.043 | 1.55 (1.16–2.07) | 0.003 |
| Floor level of residence | Per 1-floor increase | 0.99 (0.95–1.02) | 0.499 | 1.02 (0.96–1.08) | 0.441 |
| Stair-climbing trips/day | Per 1 round-trip increase | 0.94 (0.84–1.06) | 0.337 | 1.05 (0.87–1.27) | 0.598 |
| Vigorous-intensity activity | Per 60 min/week increase | 1.04 (1.02–1.07) | <0.001 | 1.02 (0.98–1.05) | 0.242 |
| Moderate-intensity activity | Per 60 min/week increase | 1.01 (0.99–1.02) | 0.415 | 1.01 (0.99–1.04) | 0.380 |
| Sitting time on a weekday | Per 60 min/day increase | 1.04 (0.99–1.09) | 0.182 | 1.04 (0.97–1.12) | 0.276 |

**Note:** Odds ratios (ORs) and 95% confidence intervals (CIs) are from the fully adjusted logistic regression model (Model 3). The exposure strata were defined by cross-classification of bone mass status (normal, osteopenia, osteoporosis) and possible sarcopenia status (No/Yes); the reference exposure category was Normal/No. Reference categories for covariates are shown in the “Contrast/Level” column (e.g., Never for smoking; Never for alcohol; Mixed for diet; No for elevator). Activity variables were scaled per 60 min/week, and sitting time per 60 min/day. NE indicates non-estimable/unstable estimates due to sparse data or (quasi-)complete separation (e.g., zero events in a category or missing-category indicators). Two-sided P values are reported to three decimals (< 0.001 shown as < 0.001).

**Abbreviations:** CI, confidence interval; NE, not estimable; OR, odds ratio.

**Supplement Table S3. Stepwise-adjusted mean differences in lumbar spine and total hip DXA T-scores across bone mass × possible sarcopenia strata.**

| **Stratum** | **Model 1: β**  **(95% CI)** | **P value** | **Model 2: β**  **(95% CI)** | **P value** | **Model 3: β**  **(95% CI)** | **P value** |
| --- | --- | --- | --- | --- | --- | --- |
| **Panel A. Lumbar spine T-score (N=1785)** | | | | | | |
| Normal/No | 0.00 (ref) | — | 0.00 (ref) | — | 0.00 (ref) | — |
| Normal/Yes | 0.13 (95% CI, -0.07–0.33) | 0.192 | 0.14 (95% CI, -0.05–0.34) | 0.149 | 0.15 (95% CI, -0.05–0.34) | 0.148 |
| Osteopenia/No | -1.58 (95% CI, -1.70–-1.46) | < 0.001 | -1.58 (95% CI, -1.70–-1.45) | < 0.001 | -1.56 (95% CI, -1.69–-1.44) | < 0.001 |
| Osteopenia/Yes | -1.47 (95% CI, -1.64–-1.30) | < 0.001 | -1.45 (95% CI, -1.62–-1.28) | < 0.001 | -1.45 (95% CI, -1.62–-1.28) | < 0.001 |
| Osteoporosis/No | -2.93 (95% CI, -3.06–-2.79) | < 0.001 | -2.89 (95% CI, -3.03–-2.76) | < 0.001 | -2.88 (95% CI, -3.01–-2.74) | < 0.001 |
| Osteoporosis/Yes | -2.82 (95% CI, -2.99–-2.66) | < 0.001 | -2.75 (95% CI, -2.91–-2.58) | < 0.001 | -2.75 (95% CI, -2.92–-2.58) | < 0.001 |
| **Panel B. Total hip T-score (N=1784)** | | | | | | |
| Normal/No | 0.00 (ref) | — | 0.00 (ref) | — | 0.00 (ref) | — |
| Normal/Yes | 0.03 (95% CI, -0.13–0.20) | 0.683 | 0.05 (95% CI, -0.11–0.22) | 0.537 | 0.08 (95% CI, -0.08–0.25) | 0.327 |
| Osteopenia/No | -1.09 (95% CI, -1.19–-0.98) | < 0.001 | -1.07 (95% CI, -1.17–-0.97) | < 0.001 | -1.08 (95% CI, -1.18–-0.98) | < 0.001 |
| Osteopenia/Yes | -1.16 (95% CI, -1.30–-1.02) | < 0.001 | -1.11 (95% CI, -1.25–-0.97) | < 0.001 | -1.10 (95% CI, -1.24–-0.96) | < 0.001 |
| Osteoporosis/No | -2.04 (95% CI, -2.16–-1.93) | < 0.001 | -2.00 (95% CI, -2.11–-1.89) | < 0.001 | -2.00 (95% CI, -2.11–-1.88) | < 0.001 |
| Osteoporosis/Yes | -2.38 (95% CI, -2.51–-2.24) | < 0.001 | -2.30 (95% CI, -2.44–-2.16) | < 0.001 | -2.28 (95% CI, -2.42–-2.14) | < 0.001 |

**Notes:** Strata were defined by cross-classification of bone mass status (normal, osteopenia, osteoporosis) and possible sarcopenia status (No/Yes). β denotes the adjusted mean difference in T-score relative to the reference stratum (Normal/No), estimated using generalized linear models with an identity link. Model 1 adjusted for age and sex. Model 2 additionally adjusted for prespecified sociodemographic factors and lifestyle variables. Model 3 further incorporated additional prespecified covariate domains, including chronic disease history, supplement use, environmental exposures, sleep patterns/nocturia, physical activity, sedentary behavior, and general health status (full covariate list shown in Supplementary Table S2). Sample size differs across panels due to site-specific missingness. P values are two-sided and reported to three decimals (< 0.001 shown as < 0.001).

**Abbreviations:** CI, confidence interval; DXA, dual-energy X-ray absorptiometry; ref, reference.

**Supplement Table S4. Fracture sites and triggers by bone mass × possible sarcopenia strata.**

| **Section** | **Category** | **N/N**  **(n=40)** | **N/Y**  **(n=16)** | **OPN/N**  **(n=104)** | **OPN/Y**  **(n=30)** | **OPS/N**  **(n=89)** | **OPS/Y**  **(n=48)** |
| --- | --- | --- | --- | --- | --- | --- | --- |
| Site | Spine | 2/40 (5.0%) | 0/16 (0.0%) | 8/104 (7.7%) | 6/30 (20.0%) | 8/89 (9.0%) | 8/48 (16.7%) |
| Site | Hip | 0/40 (0.0%) | 0/16 (0.0%) | 4/104 (3.8%) | 2/30 (6.7%) | 3/89 (3.4%) | 4/48 (8.3%) |
| Site | Clavicle | 1/40 (2.5%) | 1/16 (6.2%) | 7/104 (6.7%) | 1/30 (3.3%) | 2/89 (2.2%) | 1/48 (2.1%) |
| Site | Rib | 2/40 (5.0%) | 0/16 (0.0%) | 8/104 (7.7%) | 2/30 (6.7%) | 4/89 (4.5%) | 8/48 (16.7%) |
| Site | Limb (specified) | 33/40 (82.5%) | 13/16 (81.2%) | 69/104 (66.3%) | 18/30 (60.0%) | 58/89 (65.2%) | 24/48 (50.0%) |
| Site | Other/unspecified | 2/40 (5.0%) | 2/16 (12.5%) | 8/104 (7.7%) | 1/30 (3.3%) | 14/89 (15.7%) | 3/48 (6.2%) |
| Trigger | Traffic accident | 5/40 (12.5%) | 4/16 (25.0%) | 20/104 (19.2%) | 3/30 (10.0%) | 13/89 (14.6%) | 10/48 (20.8%) |
| Trigger | Fall | 23/40 (57.5%) | 9/16 (56.2%) | 65/104 (62.5%) | 19/30 (63.3%) | 60/89 (67.4%) | 30/48 (62.5%) |
| Trigger | Other | 12/40 (30.0%) | 3/16 (18.8%) | 17/104 (16.3%) | 7/30 (23.3%) | 14/89 (15.7%) | 6/48 (12.5%) |
| Trigger | Other/unspecified | 0/40 (0.0%) | 0/16 (0.0%) | 2/104 (1.9%) | 1/30 (3.3%) | 2/89 (2.2%) | 2/48 (4.2%) |

**Notes:** This table summarizes the full breakdown of fracture sites and triggers among participants with prior fracture history (total n = 327). Values are shown as n/N (%), where N is the number of fracture cases within each stratum. Column abbreviations: N/N, normal bone mass and no possible sarcopenia; N/Y, normal and possible sarcopenia; OPN/N, osteopenia and no possible sarcopenia; OPN/Y, osteopenia and possible sarcopenia; OPS/N, osteoporosis and no possible sarcopenia; OPS/Y, osteoporosis and possible sarcopenia. “Other/unspecified” indicates missing or non-specific self-reported responses. Overall *χ*² *P* across six strata: site 0.063; trigger 0.766. Within-category *χ*² *P* (Yes vs No): Normal 0.566/0.437; Osteopenia 0.407/0.572; Osteoporosis 0.037/0.694 (site/trigger).

**Abbreviations:** DXA, dual-energy X-ray absorptiometry.

**Supplement Table S5. Model 3–adjusted bone metabolism biomarkers across cross-classified bone mass × possible sarcopenia strata.**

| **Biomarker** | **N/N** | **N/Y** | **OPN/N** | **OPN/Y** | **OPS/N** | **OPS/Y** | **P_trend** | **P_int** |
| --- | --- | --- | --- | --- | --- | --- | --- | --- |
| **Bone turnover markers** | | | | | | | | |
| β-CTx | 0.19 (0.18–0.20) | 0.18 (0.17–0.20) | 0.21 (0.20–0.22) | 0.22 (0.20–0.23) | 0.25 (0.24–0.26) | 0.23 (0.22–0.25) | <0.001 | 0.301 |
| PINP | 39.57 (37.99–41.39) | 39.61 (36.98–42.73) | 45.64 (44.33–47.17) | 47.06 (44.47–49.73) | 54.25 (52.17–56.24) | 53.58 (50.78–56.29) | <0.001 | 0.602 |
| Osteocalcin | 11.61 (11.17–12.12) | 10.85 (10.16–11.66) | 12.99 (12.63–13.40) | 12.98 (12.30–13.68) | 15.25 (14.69–15.78) | 13.91 (13.22–14.58) | <0.001 | 0.079 |
| ALP | 72.61 (70.51–74.99) | 72.31 (68.82–76.36) | 76.38 (74.73–78.23) | 76.78 (73.75–79.88) | 82.68 (80.35–84.85) | 80.27 (77.22–83.17) | <0.001 | 0.516 |
| **Endocrine and renal markers** | | | | | | | | |
| PTH | 2.70 (2.57–2.84) | 2.40 (2.21–2.62) | 2.64 (2.55–2.74) | 2.54 (2.37–2.71) | 2.70 (2.58–2.82) | 2.56 (2.40–2.71) | 0.849 | 0.397 |
| Creatinine | 69.87 (68.56–71.41) | 70.47 (68.21–72.97) | 69.15 (68.09–70.25) | 68.35 (66.53–70.17) | 66.62 (65.32–67.77) | 66.19 (64.49–67.76) | <0.001 | 0.695 |
| **Mineral markers** | | | | | | | | |
| Calcium | 2.34 (2.33–2.36) | 2.34 (2.32–2.36) | 2.34 (2.34–2.35) | 2.36 (2.34–2.37) | 2.34 (2.33–2.35) | 2.35 (2.33–2.36) | 0.509 | 0.650 |
| Phosphorus | 1.24 (1.19–1.28) | 1.30 (1.23–1.39) | 1.27 (1.24–1.31) | 1.26 (1.20–1.32) | 1.27 (1.23–1.31) | 1.29 (1.24–1.35) | 0.292 | 0.340 |
| Magnesium | 0.99 (0.98–1.00) | 1.00 (0.99–1.02) | 1.00 (0.99–1.01) | 1.01 (0.99–1.02) | 1.00 (0.99–1.01) | 1.00 (0.98–1.01) | 0.377 | 0.248 |
| **Vitamin D fractions** | | | | | | | | |
| 25(OH)D2 | 1.19 (1.10–1.29) | 1.18 (1.04–1.37) | 1.17 (1.11–1.25) | 1.16 (1.04–1.30) | 1.11 (1.03–1.19) | 1.08 (0.97–1.18) | 0.091 | 0.935 |
| 25(OH)D3 | 15.04 (14.38–15.81) | 14.18 (13.13–15.42) | 14.84 (14.37–15.39) | 15.17 (14.25–16.13) | 14.53 (13.92–15.12) | 13.88 (13.08–14.67) | 0.113 | 0.246 |
| Total 25(OH)D | 16.13 (15.42–16.94) | 15.16 (14.06–16.47) | 15.98 (15.48–16.57) | 16.26 (15.28–17.27) | 15.52 (14.87–16.14) | 14.68 (13.84–15.49) | 0.050 | 0.219 |

**Note:** Strata were defined by cross-classification of **bone mass status** (normal, osteopenia, osteoporosis) and **possible sarcopenia** (No/Yes). Bone mass status was categorized using lumbar spine and left-hip **dual-energy X-ray absorptiometry (DXA)** T-scores; possible sarcopenia was defined dichotomously using prespecified cut-offs (see Methods). Values are **Model 3–adjusted geometric means** with **95% confidence intervals (95% CI)** for biomarkers analyzed on the log scale (β-CTx, PINP, osteocalcin, ALP, PTH, creatinine, 25(OH)D2, 25(OH)D3, total 25(OH)D), back-transformed to the original scale; and **Model 3–adjusted means** with 95% CI for approximately normally distributed mineral markers (calcium, phosphorus, magnesium). ***P*_trend** was obtained by testing an ordinal trend across the six strata ordered from lowest to highest hypothesized risk gradient. ***P*_int** is the interaction *p*-value for **bone mass status × possible sarcopenia** in Model 3. *P* values are two-sided; values < 0.001 are reported as <0.001.

**Abbreviations:** ALP, alkaline phosphatase; β-CTx, beta C-terminal telopeptide of type I collagen; CI, confidence interval; Cr, creatinine; DXA, dual-energy X-ray absorptiometry; GM, geometric mean; Mg, magnesium; P, phosphorus; PINP, procollagen type I N-terminal propeptide; PTH, parathyroid hormone; 25(OH)D2, 25-hydroxyvitamin D2; 25(OH)D3, 25-hydroxyvitamin D3; total 25(OH)D, total 25-hydroxyvitamin D. N/N = Normal/No, N/Y = Normal/Yes, OPN/N = Osteopenia/No, OPN/Y = Osteopenia/Yes, OPS/N = Osteoporosis/No, OPS/Y = Osteoporosis/Yes。

**Supplement Table S6. Sensitivity analyses under alternative definitions and sample restrictions.**

| **Scenario** | **Outcome** | **Effect measure** | **Estimate**  **(lower–upper)** | ***P* value** | **N** |
| --- | --- | --- | --- | --- | --- |
| Main analysis | Falls ≥1 | Odds ratio | 1.66 (1.00–2.76) | 0.045 | 1786 |
| Main analysis | Falls ≥2 | Odds ratio | 1.35 (0.58–3.11) | 0.487 | 1786 |
| Main analysis | Prior fracture | Odds ratio | 1.59 (0.93–2.73) | 0.089 | 1786 |
| Main analysis | Lumbar T-score | Mean difference | −2.75 (−2.92–−2.59) | < 0.001 | 1786 |
| Main analysis | Hip T-score | Mean difference | −2.55 (−2.68–−2.42) | < 0.001 | 1786 |
| Bone status: lumbar only | Falls ≥1 | Odds ratio | 1.52 (0.92–2.51) | 0.103 | 1786 |
| Bone status: lumbar only | Falls ≥2 | Odds ratio | 1.14 (0.50–2.58) | 0.758 | 1786 |
| Bone status: lumbar only | Prior fracture | Odds ratio | 1.45 (0.85–2.49) | 0.179 | 1786 |
| Bone status: lumbar only | Lumbar T-score | Mean difference | −2.93 (−3.10–−2.76) | <0.001 | 1786 |
| Bone status: lumbar only | Hip T-score | Mean difference | −1.53 (−1.66–−1.40) | < 0.001 | 1786 |
| Bone status: hip only | Falls ≥1 | Odds ratio | 1.72 (1.05–2.80) | 0.032 | 1786 |
| Bone status: hip only | Falls ≥2 | Odds ratio | 1.37 (0.59–3.15) | 0.461 | 1786 |
| Bone status: hip only | Prior fracture | Odds ratio | 1.72 (1.01–2.92) | 0.045 | 1786 |
| Bone status: hip only | Lumbar T-score | Mean difference | −1.54 (−1.72–−1.36) | < 0.001 | 1786 |
| Bone status: hip only | Hip T-score | Mean difference | −2.81 (−2.94–−2.69) | < 0.001 | 1786 |
| Possible sarcopenia: grip only | Falls ≥1 | Odds ratio | 1.61 (0.98–2.64) | 0.059 | 1786 |
| Possible sarcopenia: grip only | Falls ≥2 | Odds ratio | 1.28 (0.55–2.97) | 0.559 | 1786 |
| Possible sarcopenia: grip only | Prior fracture | Odds ratio | 1.65 (0.97–2.83) | 0.066 | 1786 |
| Possible sarcopenia: grip only | Lumbar T-score | Mean difference | −2.78 (−2.95–−2.62) | < 0.001 | 1786 |
| Possible sarcopenia: grip only | Hip T-score | Mean difference | −2.60 (−2.73–−2.47) | < 0.001 | 1786 |
| Possible sarcopenia: chair-stand only | Falls ≥1 | Odds ratio | 1.58 (0.97–2.58) | 0.064 | 1786 |
| Possible sarcopenia: chair-stand only | Falls ≥2 | Odds ratio | 1.31 (0.57–3.02) | 0.523 | 1786 |
| Possible sarcopenia: chair-stand only | Prior fracture | Odds ratio | 1.55 (0.90–2.67) | 0.113 | 1786 |
| Possible sarcopenia: chair-stand only | Lumbar T-score | Mean difference | −2.71 (−2.87–−2.54) | <0.001 | 1786 |
| Possible sarcopenia: chair-stand only | Hip T-score | Mean difference | −2.58 (−2.71–−2.45) | <0.001 | 1786 |
| Complete-case (bone+grip+chair) | Falls ≥1 | Odds ratio | 1.64 (0.98–2.75) | 0.061 | 1669 |
| Complete-case (bone+grip+chair) | Falls ≥2 | Odds ratio | 1.34 (0.55–3.27) | 0.514 | 1669 |
| Complete-case (bone+grip+chair) | Prior fracture | Odds ratio | 1.53 (0.86–2.71) | 0.152 | 1669 |
| Complete-case (bone+grip+chair) | Lumbar T-score | Mean difference | −2.75 (−2.91–−2.58) | < 0.001 | 1669 |
| Complete-case (bone+grip+chair) | Hip T-score | Mean difference | −2.55 (−2.68–−2.42) | < 0.001 | 1669 |
| Exclude prior hip fracture | Falls ≥1 | Odds ratio | 1.66 (0.99–2.78) | 0.052 | 1741 |
| Exclude prior hip fracture | Falls ≥2 | Odds ratio | 1.43 (0.60–3.39) | 0.419 | 1741 |
| Exclude prior hip fracture | Prior fracture | Odds ratio | 1.32 (0.75–2.33) | 0.338 | 1741 |
| Exclude prior hip fracture | Lumbar T-score | Mean difference | −2.75 (−2.92–−2.59) | < 0.001 | 1741 |
| Exclude prior hip fracture | Hip T-score | Mean difference | −2.55 (−2.69–−2.42) | < 0.001 | 1741 |
| Exclude long-term glucocorticoids | Falls ≥1 | Odds ratio | 1.67 (1.00–2.80) | 0.051 | 1758 |
| Exclude long-term glucocorticoids | Falls ≥2 | Odds ratio | 1.37 (0.59–3.19) | 0.466 | 1758 |
| Exclude long-term glucocorticoids | Prior fracture | Odds ratio | 1.59 (0.92–2.75) | 0.096 | 1758 |
| Exclude long-term glucocorticoids | Lumbar T-score | Mean difference | −2.74 (−2.91–−2.58) | < 0.001 | 1758 |
| Exclude long-term glucocorticoids | Hip T-score | Mean difference | −2.55 (−2.69–−2.42) | < 0.001 | 1758 |

**Note:** Values in parentheses indicate 95% confidence intervals. Estimates compare Osteoporosis/Yes with the reference stratum Normal/No. Binary outcomes are reported as odds ratios from logistic regression; continuous outcomes are adjusted mean differences (β) from generalized linear models with an identity link. All estimates are from the fully adjusted model (Model 3) using the covariate set specified in the Methods. Sensitivity scenarios redefine bone mass status (lumbar-only or hip-only DXA T-scores), redefine possible sarcopenia (grip-only or chair-stand-only), restrict to complete-case participants with non-missing bone and muscle measures, exclude participants with prior hip fracture, or exclude long-term glucocorticoid users. N denotes the number of participants included in each model. P values are two-sided and reported to three decimals (< 0.001 shown as < 0.001).

**Abbreviations:** CI, confidence interval; dual-energy X-ray absorptiometry (DXA); OR, odds ratio.


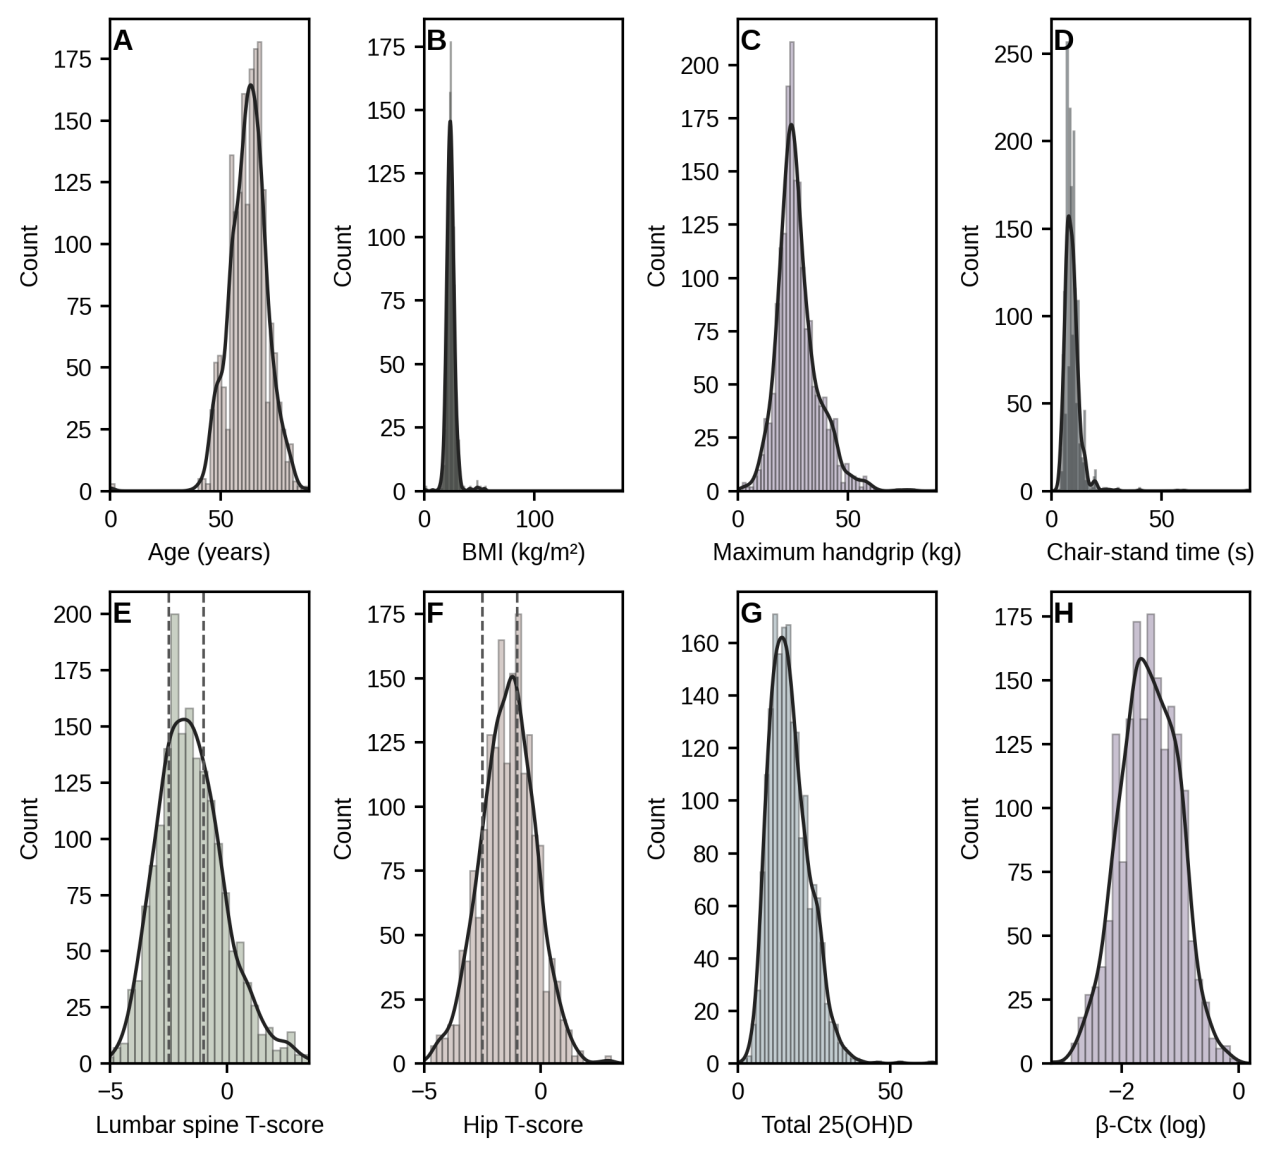


### Supplement Figure S1. Distributions and tail checks for key continuous variables.

**Legend:** Multi-panel histograms (with kernel density overlays) summarize the distributions of key continuous measures in the analytic cohort, supporting extreme-value inspection and prespecified transformation choices for subsequent models. Panels include age, BMI, maximum handgrip strength, chair-stand time, lumbar spine and hip T-scores (with dashed lines marking −1.0 and −2.5 clinical cut-points used for bone-mass categorization), total 25(OH)D, and β-CTx displayed on the log scale.


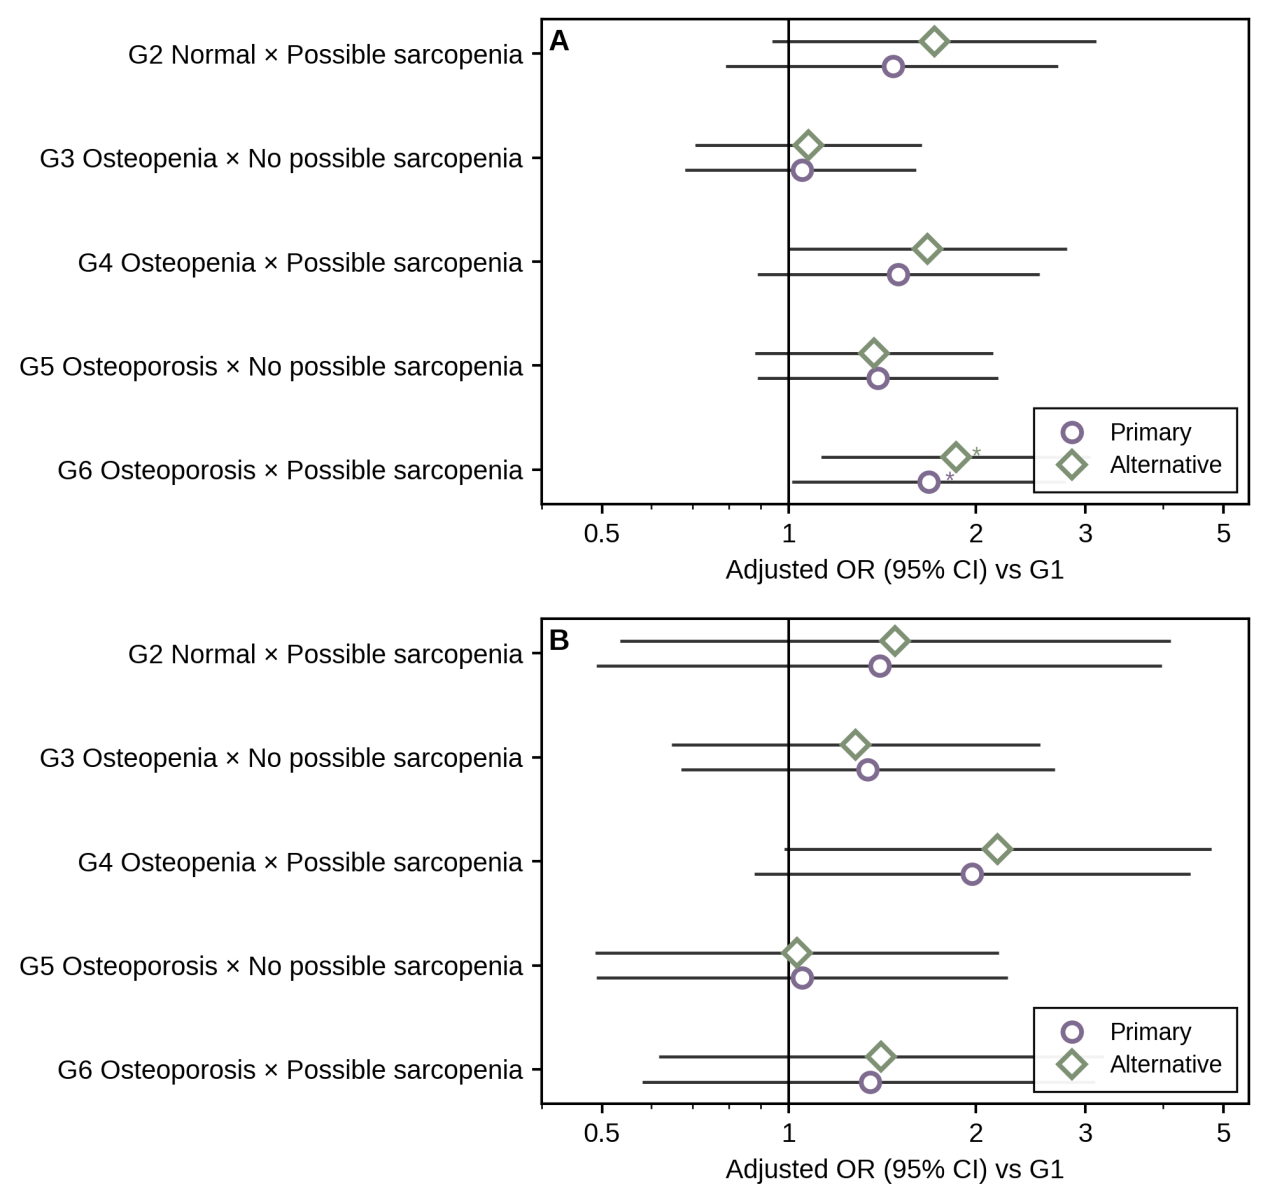


### Supplement Figure S2. Sensitivity to missingness handling rules.

**Legend:** Fully adjusted (Model 3) associations between cross-classified strata (G2–G6) and past-year falls are shown as adjusted odds ratios (ORs) with 95% confidence intervals, using **G1** as the reference. Two missingness-handling strategies are contrasted: **Primary**, using prespecified deterministic recoding rules for blanks to preserve the main analytic definition; and **Alternative**, using a missing-level/indicator approach. Panel **A**: falls ≥1 (primary outcome). Panel **B**: falls ≥2 (secondary outcome). Asterisks denote statistical significance for OR vs 1 (* p<0.05; ** p<0.01; *** p<0.001); all tests are two-sided.


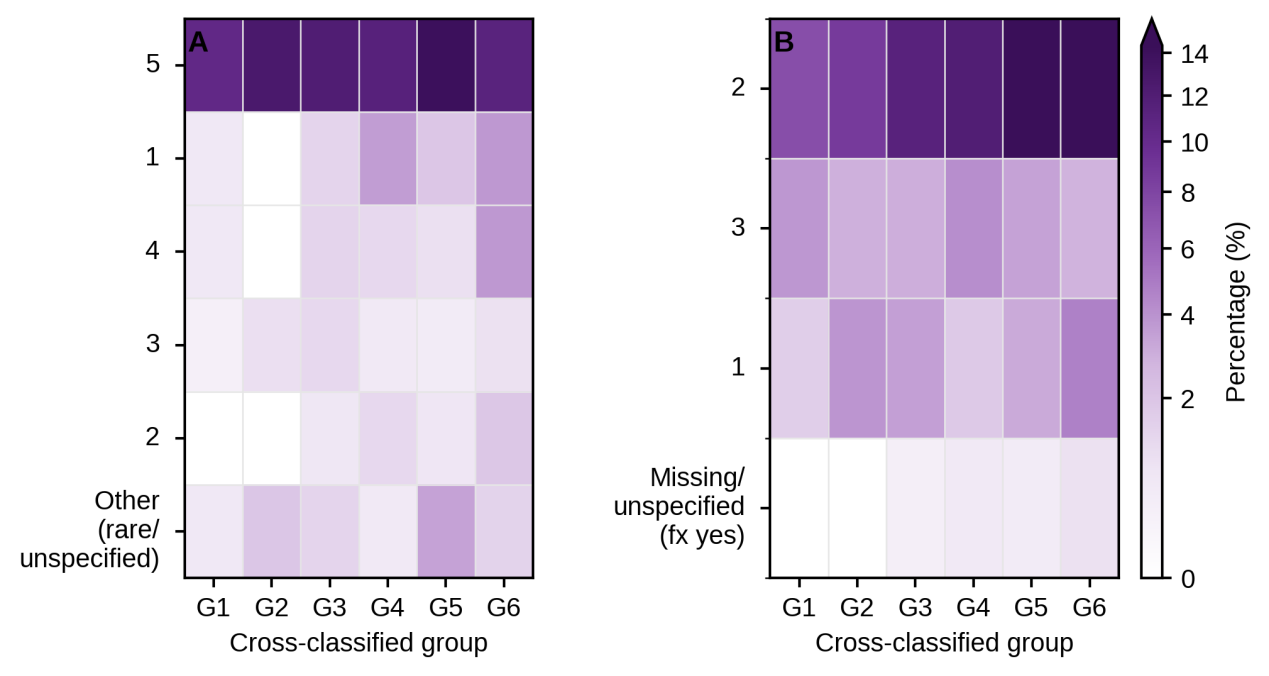


**Supplement Figure S3 Expanded heatmaps of fragility fracture site and trigger distributions by cross-classified group (G1–G6).**

**Legend:** Heatmaps display category-level profiles corresponding to the main-text “Top categories + Other” presentation, while retaining the expanded set of categories. Values represent **within-stratum percentages among participants reporting a prior fragility fracture**, allowing comparison of profile composition across groups without conflating composition with overall fracture prevalence. **Darker shading indicates higher percentages.** **(A)** Fracture sites. **(B)** Fracture triggers (including other/unknown categories where applicable).


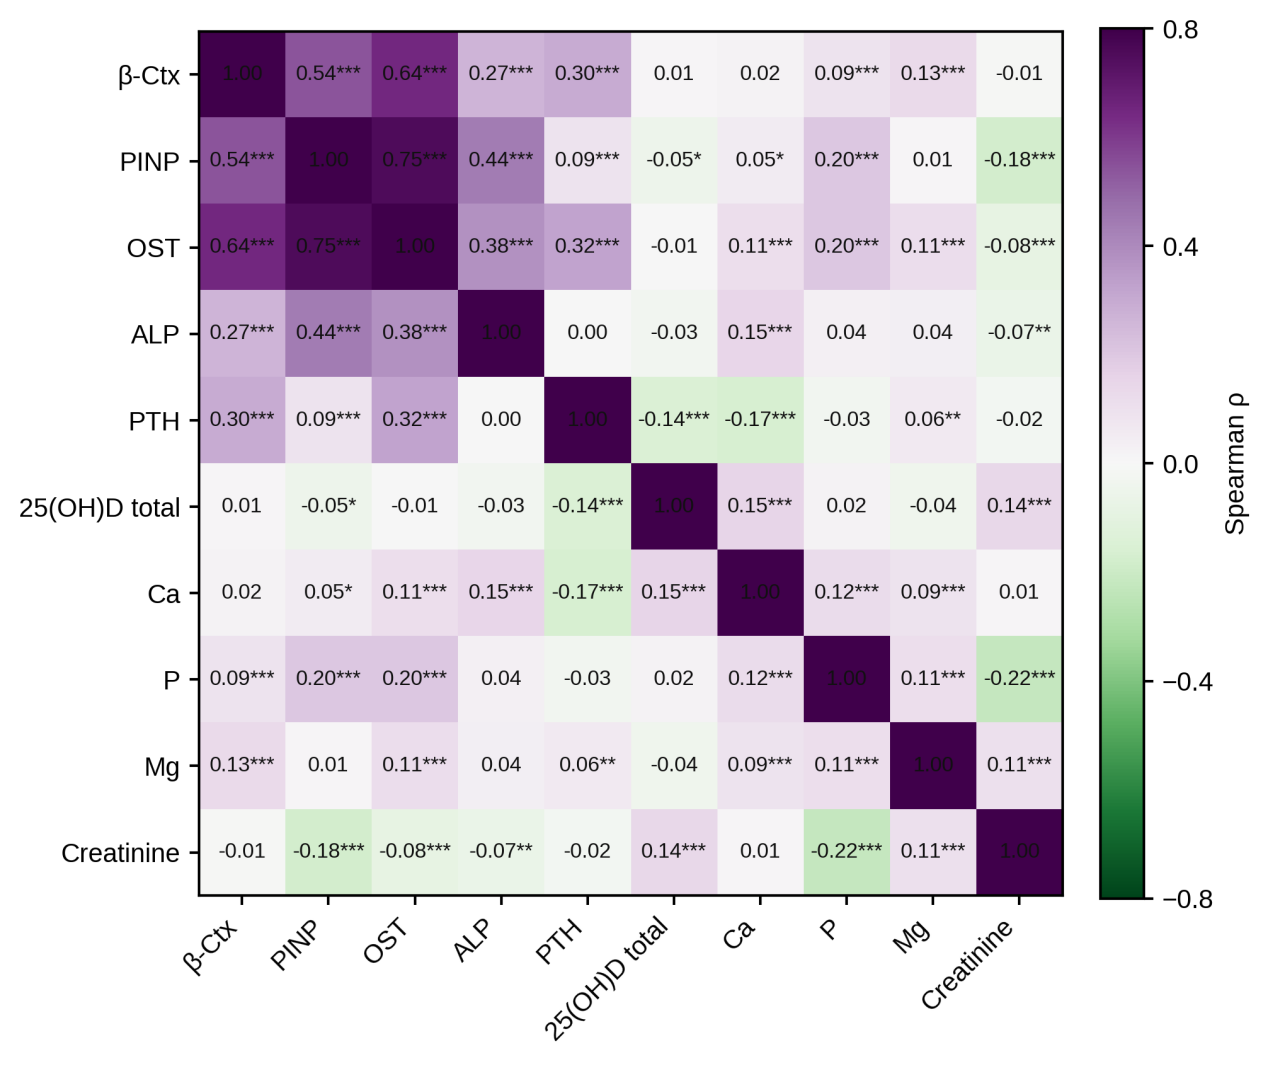


### Supplement Figure S4. Correlation structure among biomarkers.

**Legend:** Spearman correlation matrix among bone turnover, endocrine, mineral homeostasis, vitamin D fractions, and renal background markers. Correlations are computed on the analysis scale used in modeling (log-transformed where appropriate), and cells display Spearman’s ρ. The heatmap is intended to document internal consistency of the biomarker “spectrum” as supportive evidence rather than to imply mechanistic causality.


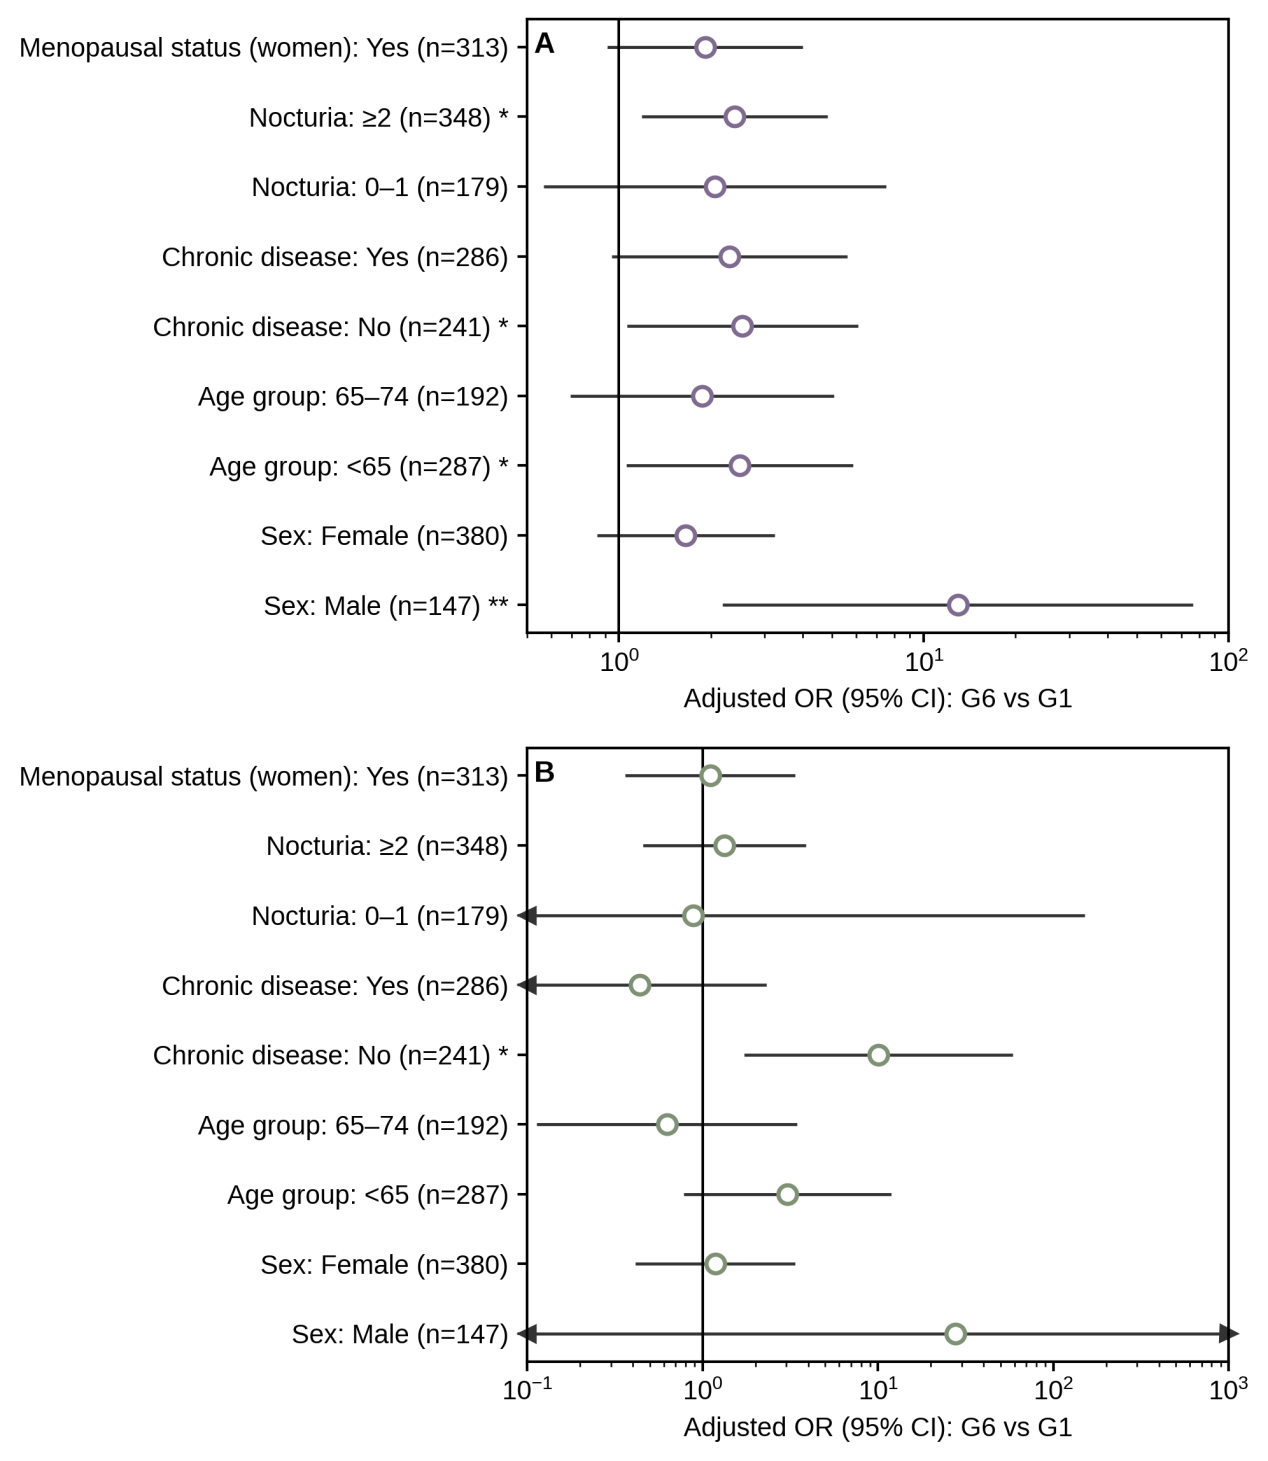


### **Supplementary Figure S5. Subgroup forest plots for the highest-risk contrast (G6 vs G1).**

### **Legend:** Subgroup analyses evaluate the fully adjusted (Model 3) association for the highest-risk contrast (G6 vs G1). Points and horizontal bars represent adjusted ORs and 95% confidence intervals within each subgroup stratum. Panel A: falls ≥1. Panel B: falls ≥2. Asterisks appended to subgroup labels denote statistical significance for OR vs 1 (* p<0.05; ** p<0.01; *** p<0.001); all tests are two-sided.
